# Supplementary material for: Valorization of Olive Pomace-Based Nutraceuticals as Antioxidants in Chemical, Food, and Biological Models
Source: PubMed Central journal article supplement (PMC6222651; doi:10.3390/molecules23082070), 2018-08-18
Supplement: molecules-23-02070-s001.pdf [file molecules-23-02070-s001.pdf]

**Table S1.** HPLC elution program (gradient of mobile phase and flow rate). A mobile phase is sodium acetate buffer (pH 5.0), and B is acetonitrile.

| <i>t</i> [min] | Flow rate [mL/min] | A [%] | B [%] |
|----------------|--------------------|-------|-------|
| 0              | 1                  | 90    | 10    |
| 4              | 1                  | 80    | 20    |
| 8              | 1                  | 40    | 60    |
| 11             | 1                  | 30    | 70    |
| 15             | 1                  | 90    | 10    |
| 20             | 1                  | 90    | 10    |

A: sodium acetate buffer (pH 5.0); B: acetonitrile.

**Table S2.** ESI-MS/MS parameters for studied phenolic compounds.

| Compound                      | Rt (min) | Precursor ion (m/z) | Product ion (m/z) | Cone voltage (V) | Collision energy (V) | Ionization mode |
|-------------------------------|----------|---------------------|-------------------|------------------|----------------------|-----------------|
| 3,4-dihydroxybenzoic acid     | 7.189    | 153                 | 109               | 70               | 10                   | -               |
| <i>p</i> -hydroxybenzoic acid | 9.665    | 137                 | 93                | 90               | 5                    | -               |
| Homovanillic acid             | 10.366   | 150.9               | 91/119            | 100              | 15                   | +               |
| Vanillic acid                 | 10.741   | 168.9               | 93                | 100              | 5                    | +               |

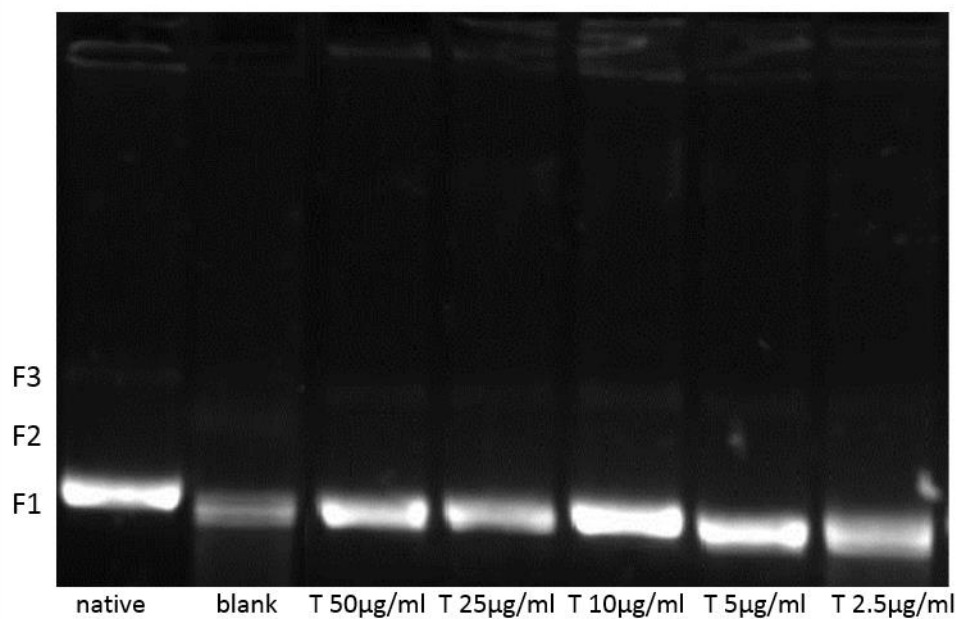

**Figure S1.** Plasmid pBR322 DNA forms visible after electrophoresis in agarosis gel in the presence or absence of free radicals (AAPH) and/or antioxidants (Trolox). native sample (DNA in phosphate buffer); blank (DNA+AAPH; no antioxidants); T (DNA+AAPH+Trolox); F1: native, supercoiled form; F2: linear plasmid; F3: nicked relaxed circular plasmid.
